# Supplementary material for: Predicting mortality from AI cardiac volumes mass and coronary calcium on chest computed tomography
Source: Springer Nature journal article supplement (doi:10.1038/s41467-024-46977-3), 2024-03-29
Supplement: MOESM1 [file 41467_2024_46977_MOESM1_ESM.pdf]

# SUPPLEMENT

## Supplemental Figure 1

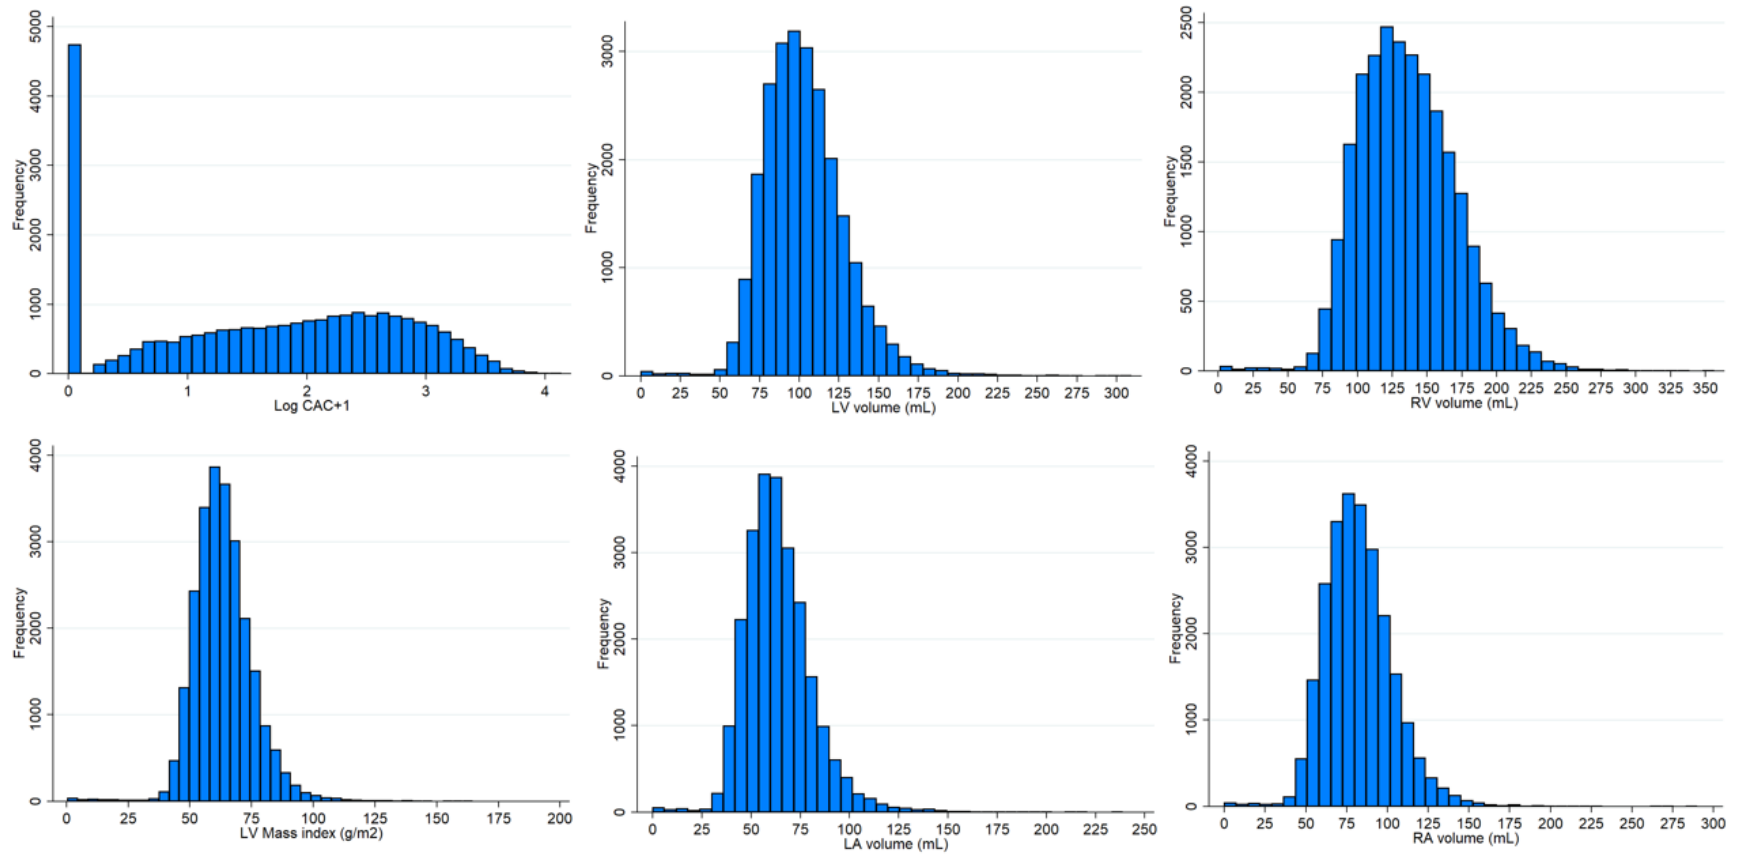

Supplemental Figure 1. Distribution of automated measures. Distribution of coronary artery coronary artery calcium (CAC), left ventricular (LV) mass index, cardiac chamber volumes, shape index, and eccentricity index in blue bars. LA – left atrial, RA – right atrial, RV – right ventricular. Source data is available.

Supplemental Figure 2

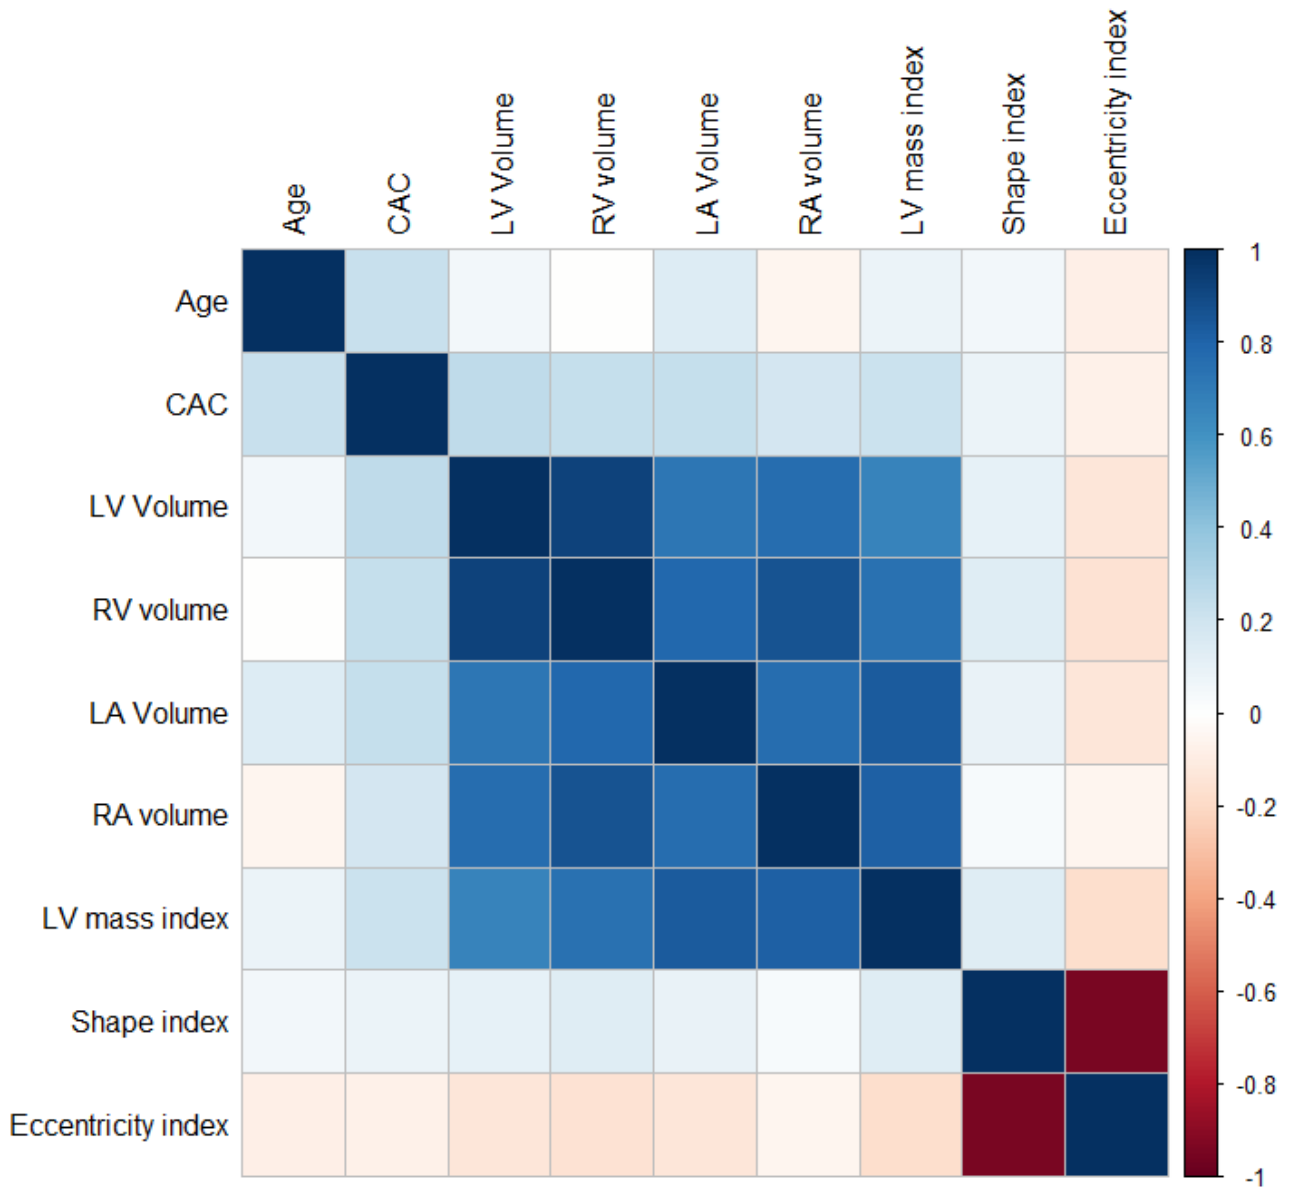

Supplemental Figure 2: Correlation matrix. Correlation matrix for age, coronary artery calcium (CAC), left ventricular (LV) mass index, cardiac chamber volumes, shape index, and eccentricity index. LA – left atrial, RA – right atrial, RV – right ventricular. Colors reflect correlations as outlined in Figure. Source data is available.

Supplemental Figure 3

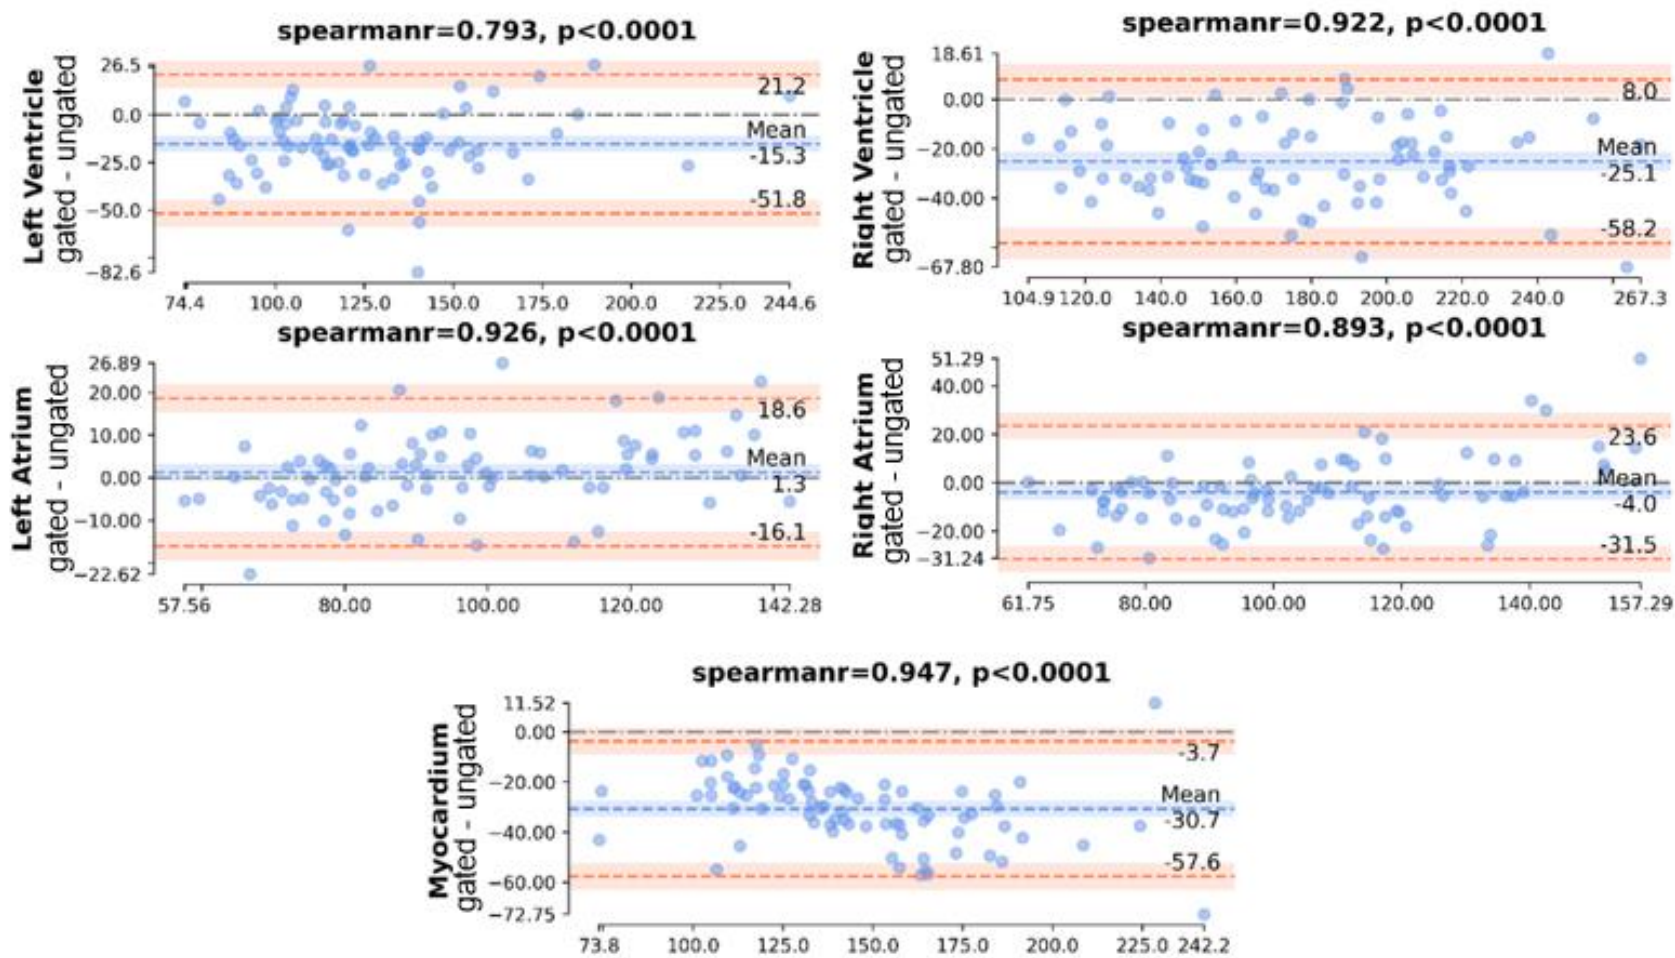

Supplemental Figure 3: Correlation between estimates of cardiac volumes and left ventricular mass from low-dose, ungated CT and contrast-enhanced, ECG-gated, cardiac CT. Individual patients shown as blue dots with limits of agreement with orange dashed lines.

Supplemental Figure 4

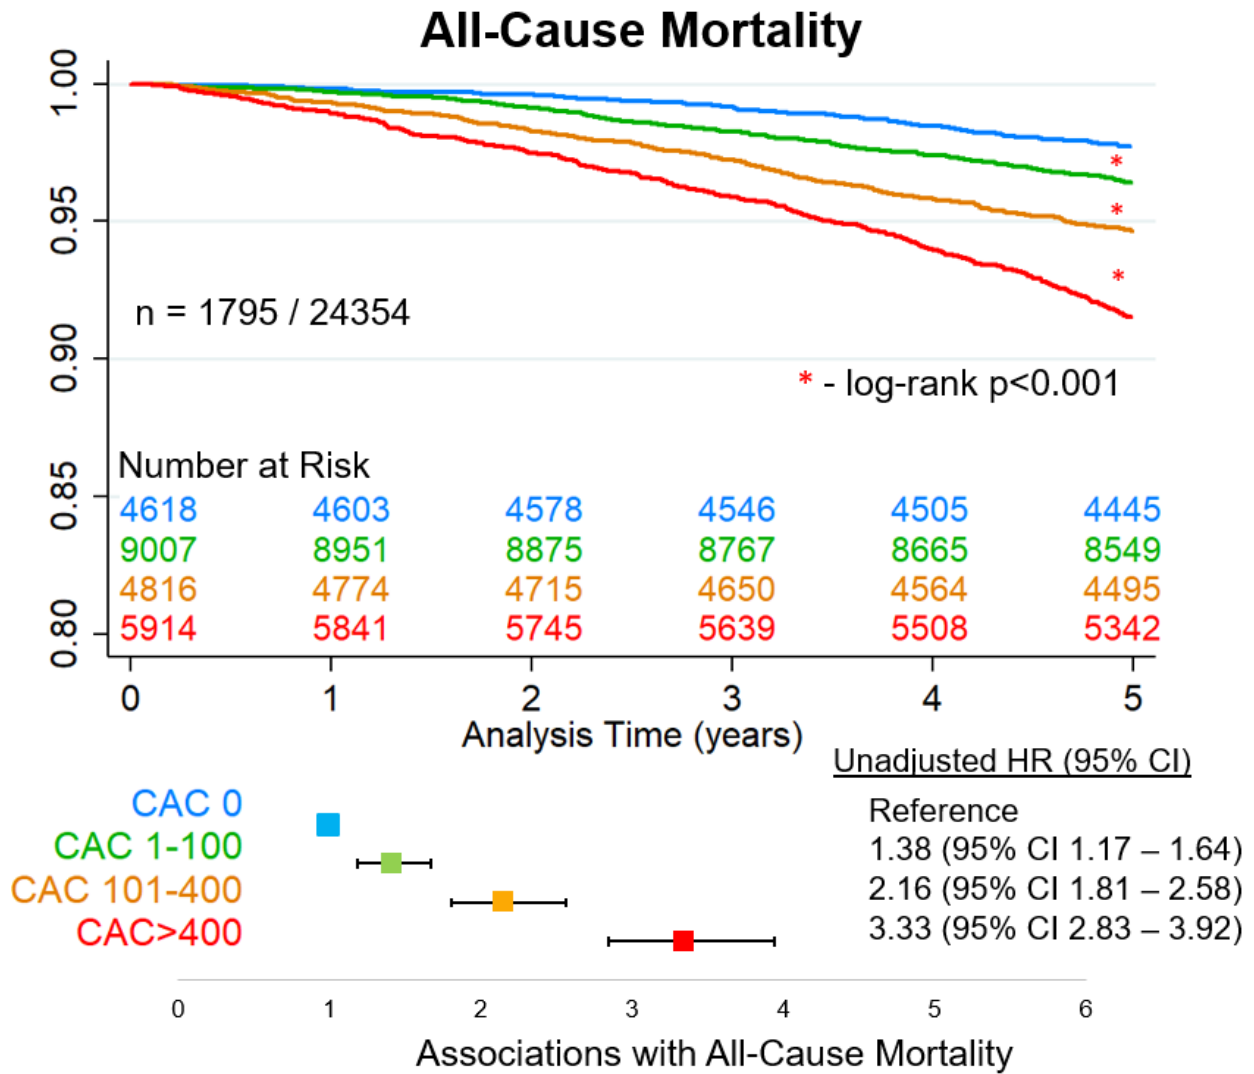

Supplemental Figure 4: Kaplan-Meier survival curves for all-cause mortality patients stratified by deep-learning coronary artery calcium (CAC) scores. Colors reflect CAC score groups as defined in the figure. CI – confidence interval, HR – hazard ratio. Source data is available.

Supplemental Figure 5

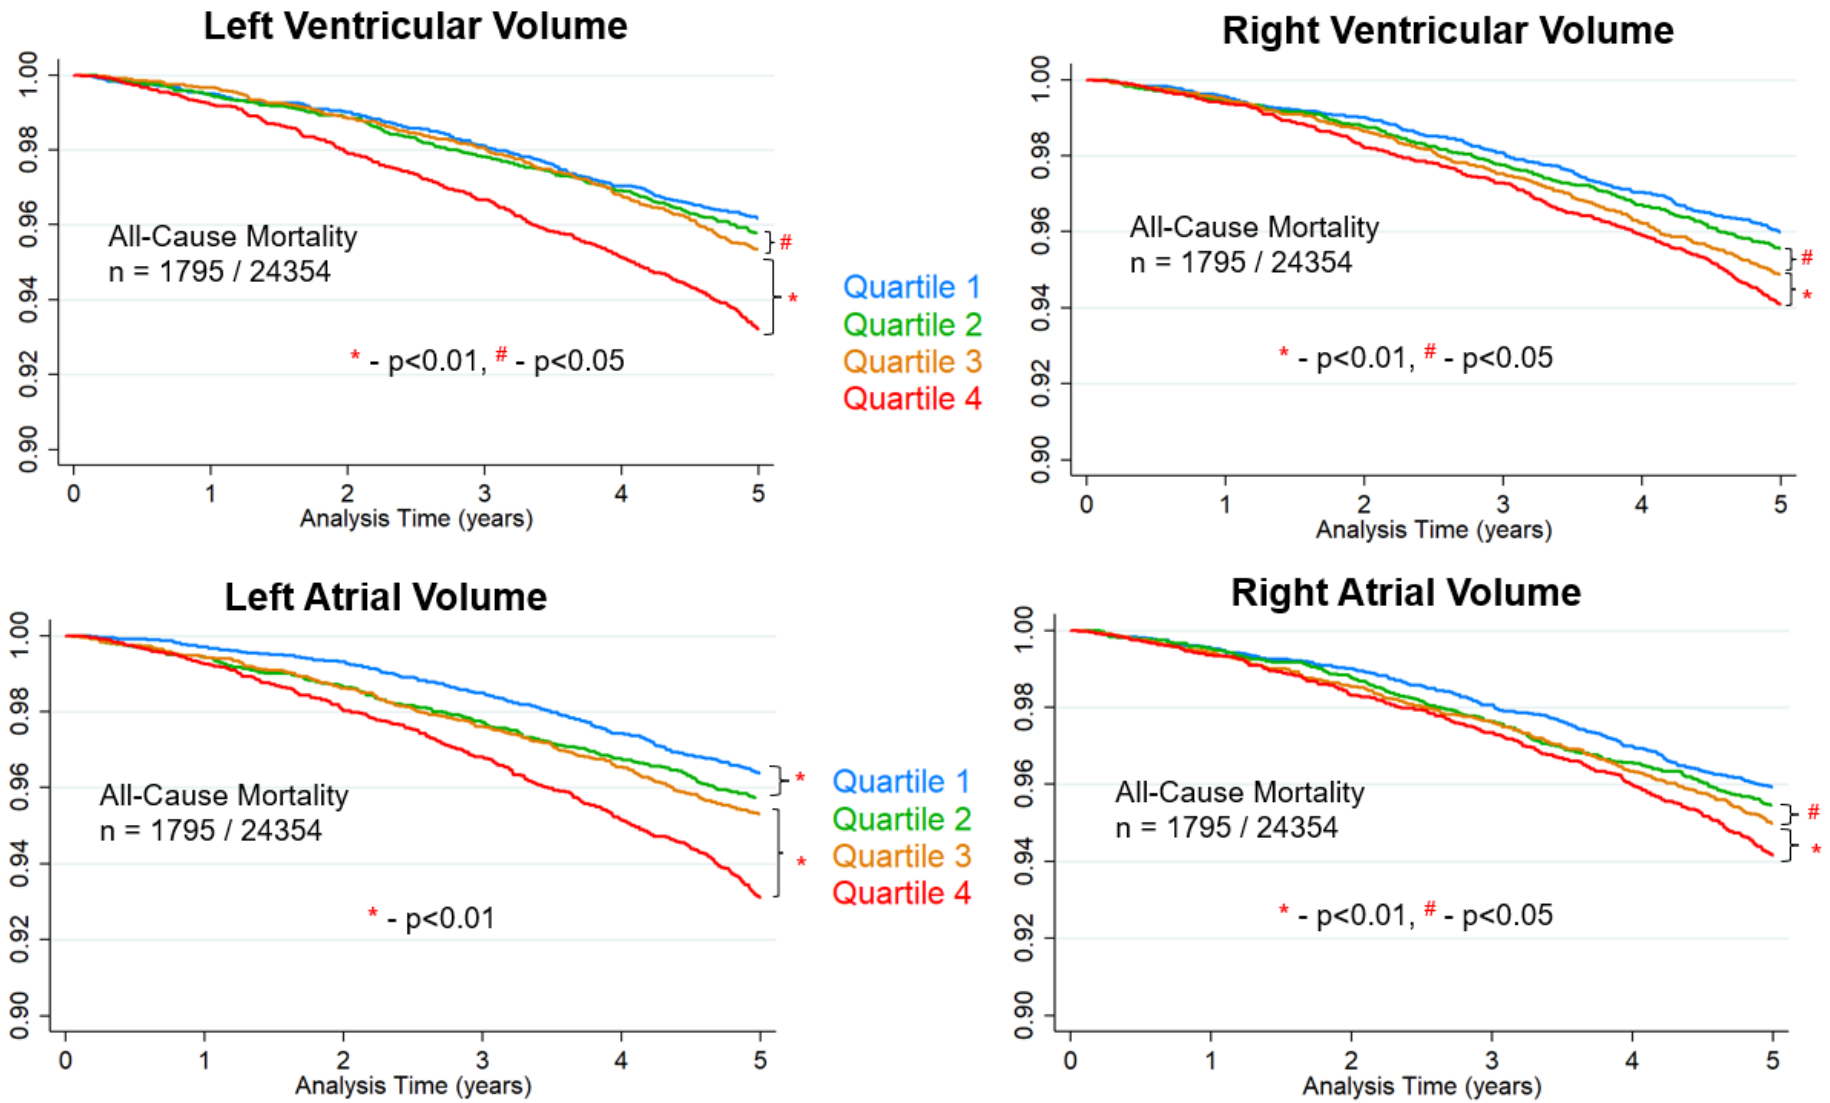

Supplemental Figure 5: Kaplan-Meier survival curves for all-cause mortality stratified by quartile of chamber volume. Colors reflect quartiles as defined in the figure. Source data is available.

Supplemental Figure 6

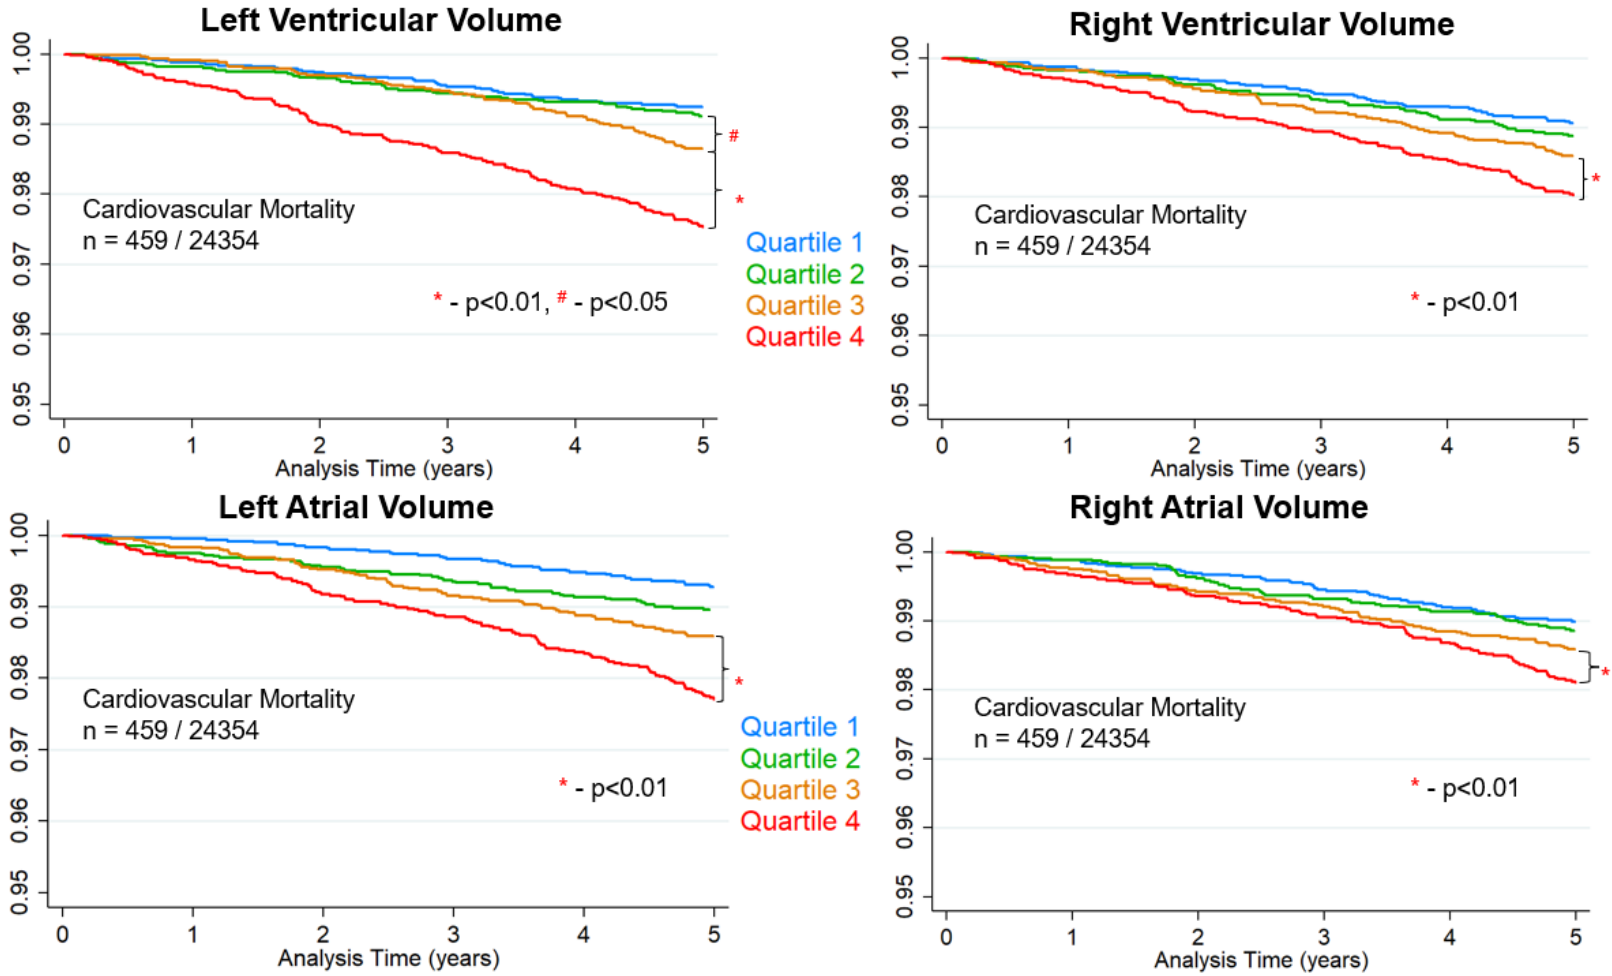

Supplemental Figure 6: Kaplan-Meier survival curves for cardiovascular mortality stratified by quartile of chamber volume. Colors reflect quartiles as defined in the figure. Source data is available.

Supplemental Figure 7

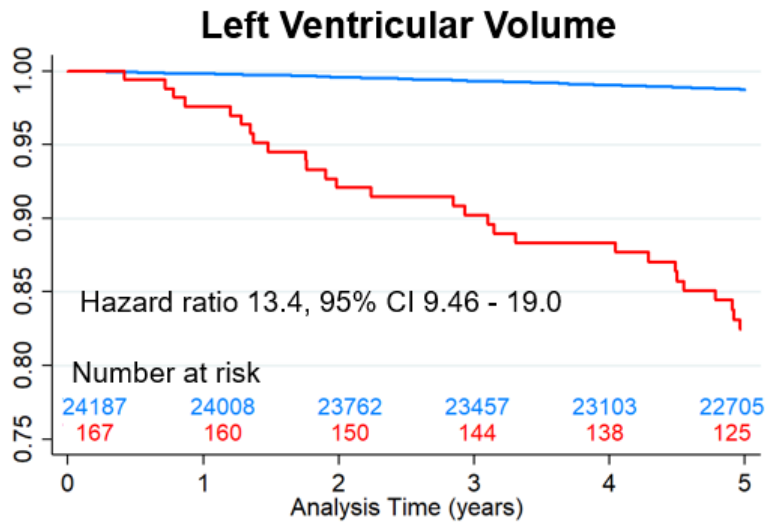

Normal  
Abnormal

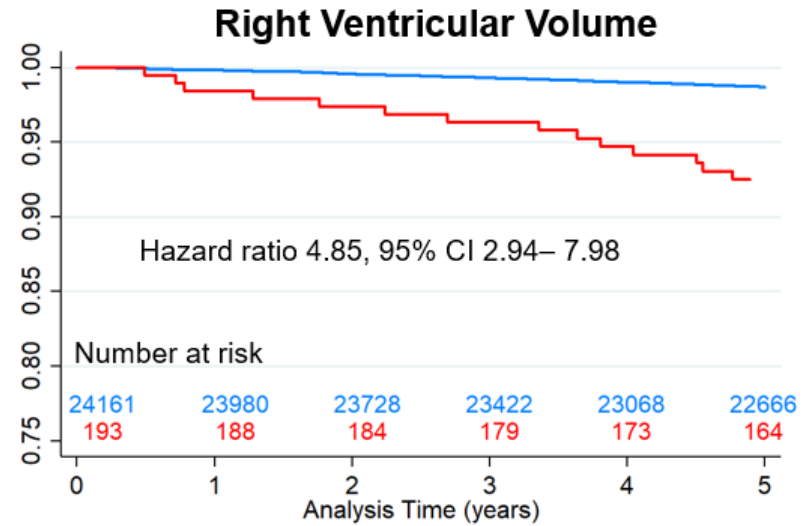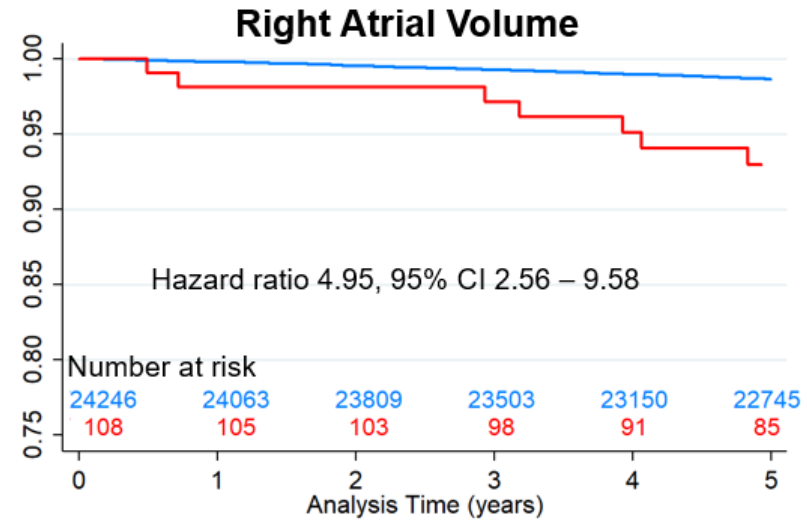

Normal  
Abnormal



Supplemental Figure 7: Kaplan-Meier survival curves for cardiovascular mortality by normal (blue) or abnormal (red) chamber volume. In women, the thresholds for abnormal chamber volumes were: left ventricle volume > 147mL, right ventricle volume > 180mL, left atrium volume > 99mL and right

atrium volume >126mL. In men, the thresholds for abnormal chamber volumes were: left ventricle volume > 195mL, right ventricle volume > 240mL, left atrium volume > 121mL and right atrium volume >162mL. CI – confidence interval. Source data is available.

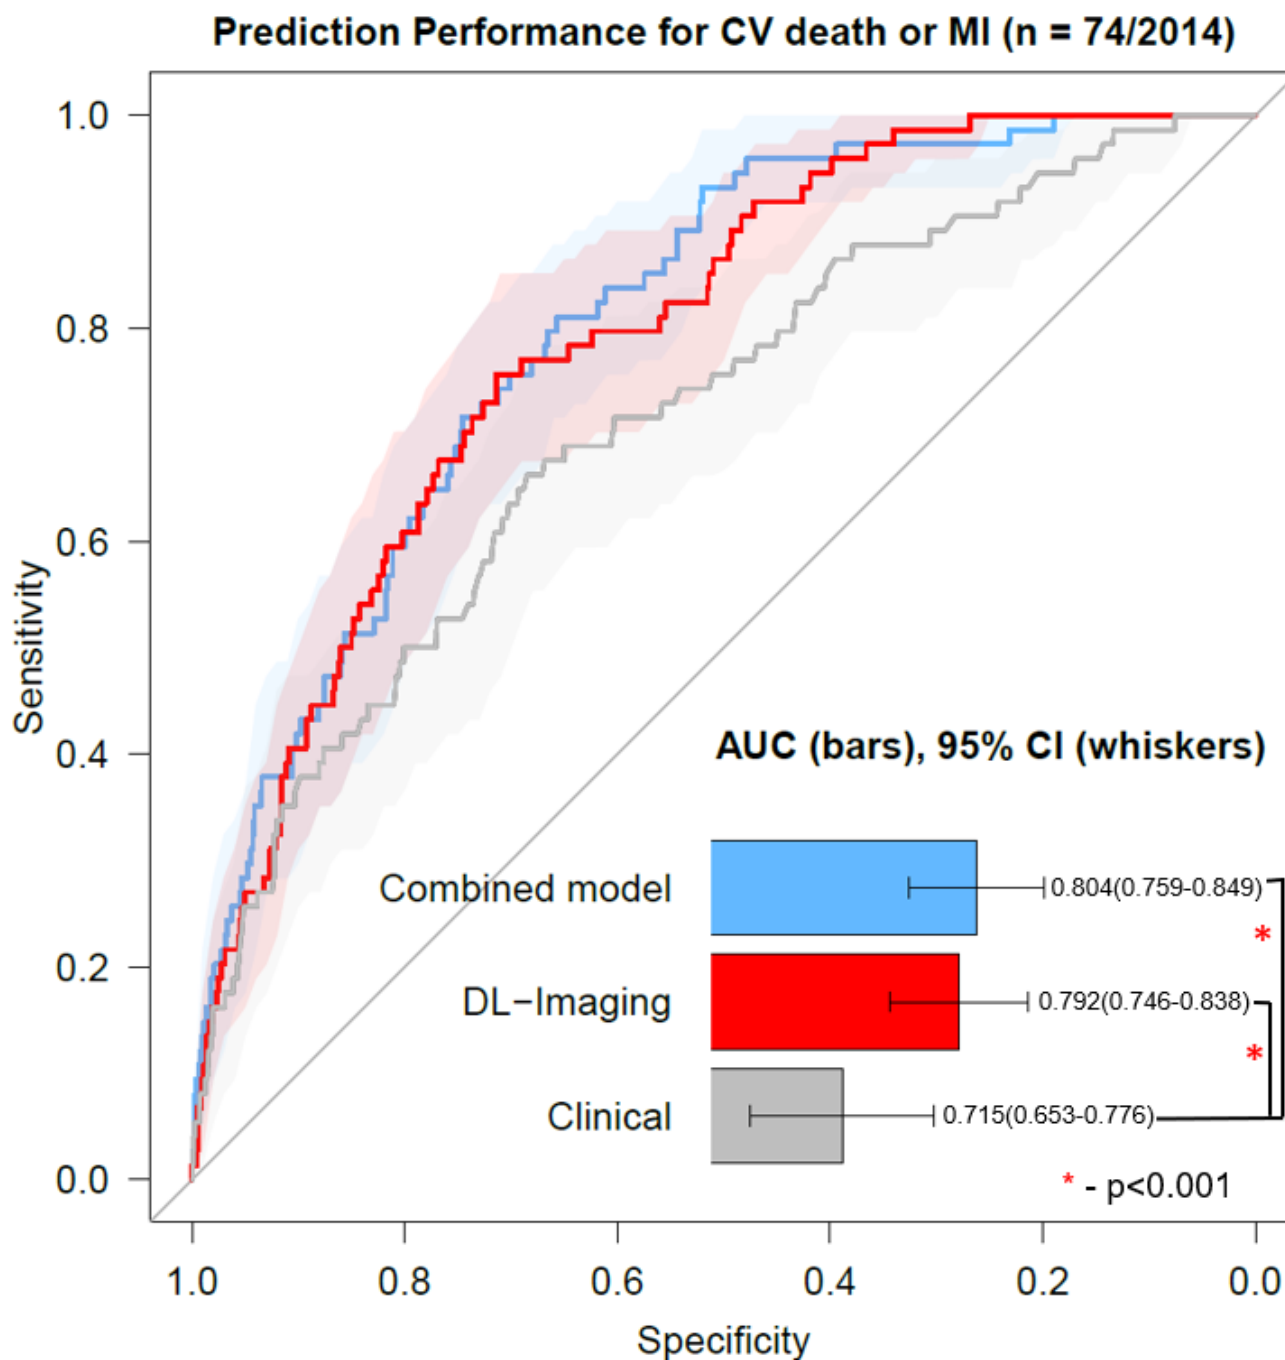

Supplemental Figure 8: Receiver operating characteristic curves for cardiac (CV) death or myocardial infarction (MI) for the Early Identification of Subclinical Atherosclerosis by Noninvasive Imaging Research trial. The models included were clinical (age, sex, medical history - grey), deep learning (DL) derived imaging variables (coronary artery calcium, cardiac volumes, shape index, eccentricity index, and left ventricular mass index - red), and a combined model incorporating all variables (DL derived and clinical variables - blue). Variables were integrated using logistic regression analyses. AUC – area under the receiver operating characteristic curve, CI – confidence interval. Source data is available.

### Prediction Performance for death or MI (n = 177/3319)

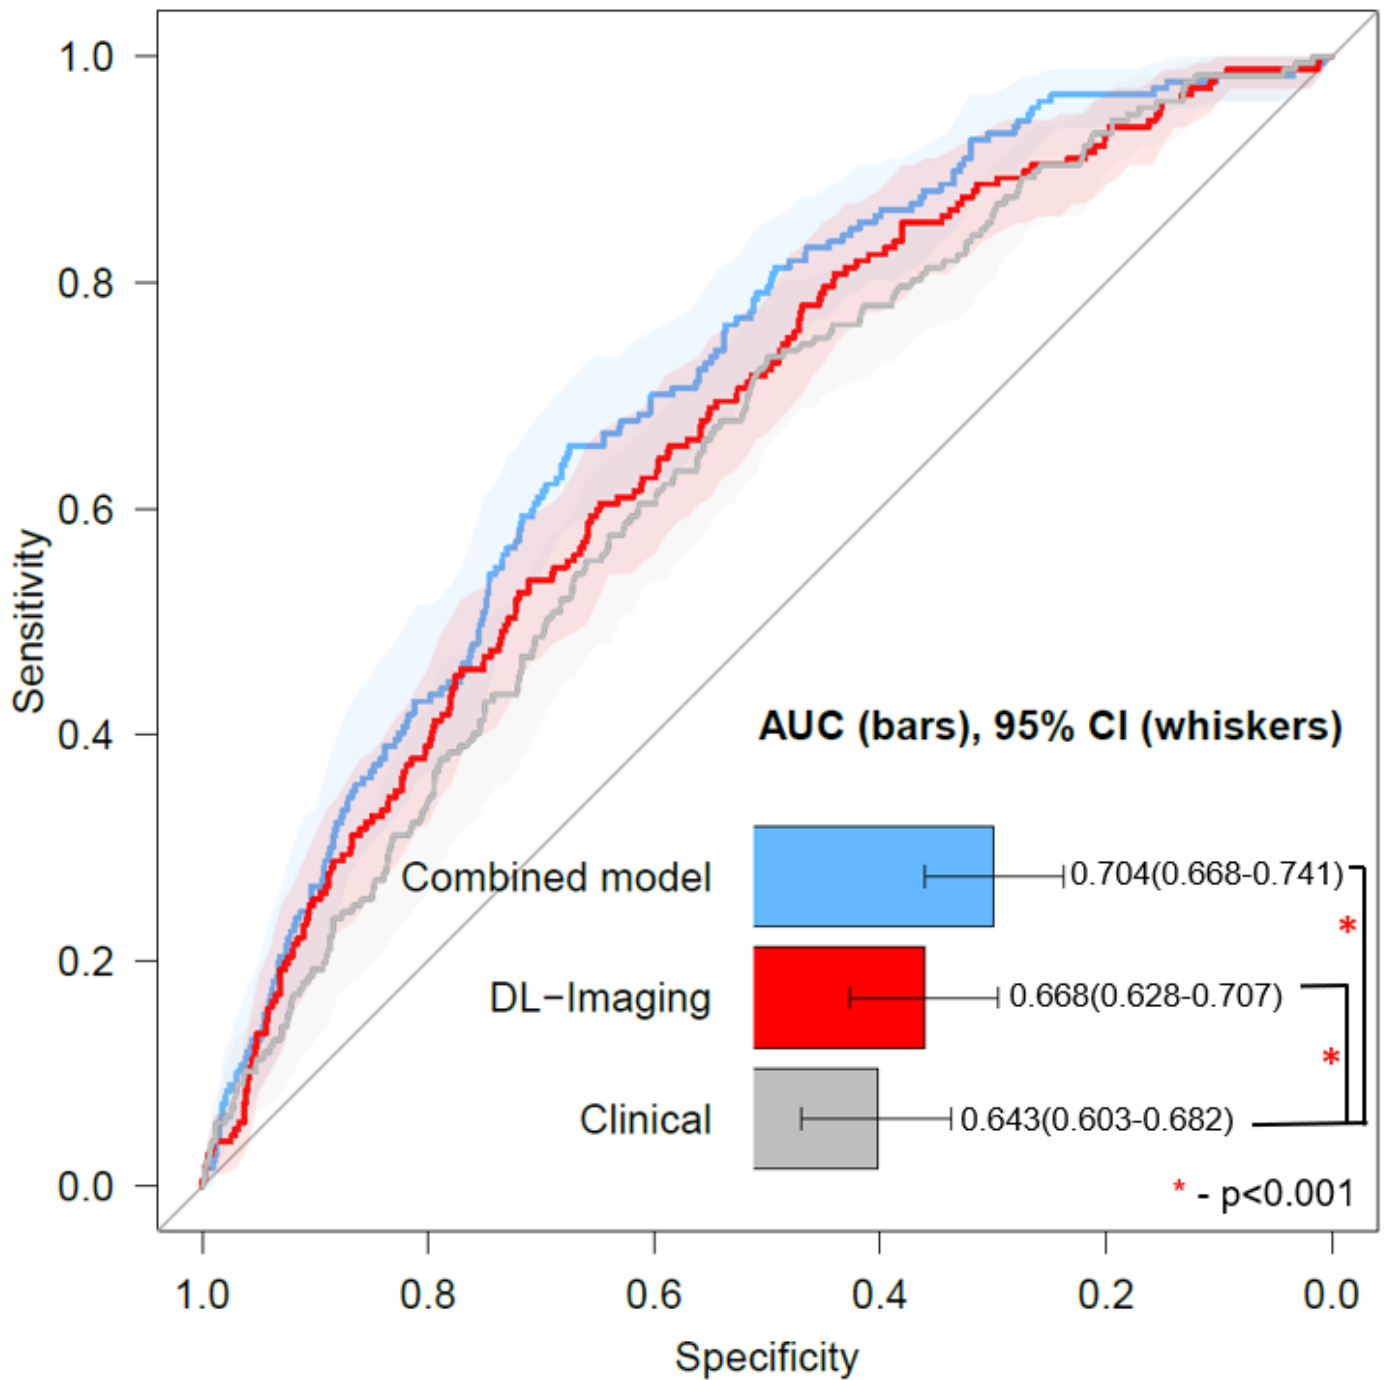

Supplemental Figure 9: Receiver operating characteristic curves for death or myocardial infarction (MI) in the low dose computed tomography population. The models included were clinical (age, sex, medical history - grey), deep learning (DL) derived imaging variables (coronary artery calcium, cardiac volumes, shape index, eccentricity index, and left ventricular mass index - red), and a combined model incorporating all variables (DL derived and clinical variables - blue). Variables were integrated using logistic regression analyses. AUC – area under the receiver operating characteristic curve, CI – confidence interval. Source data is available.

Supplemental Figure 10

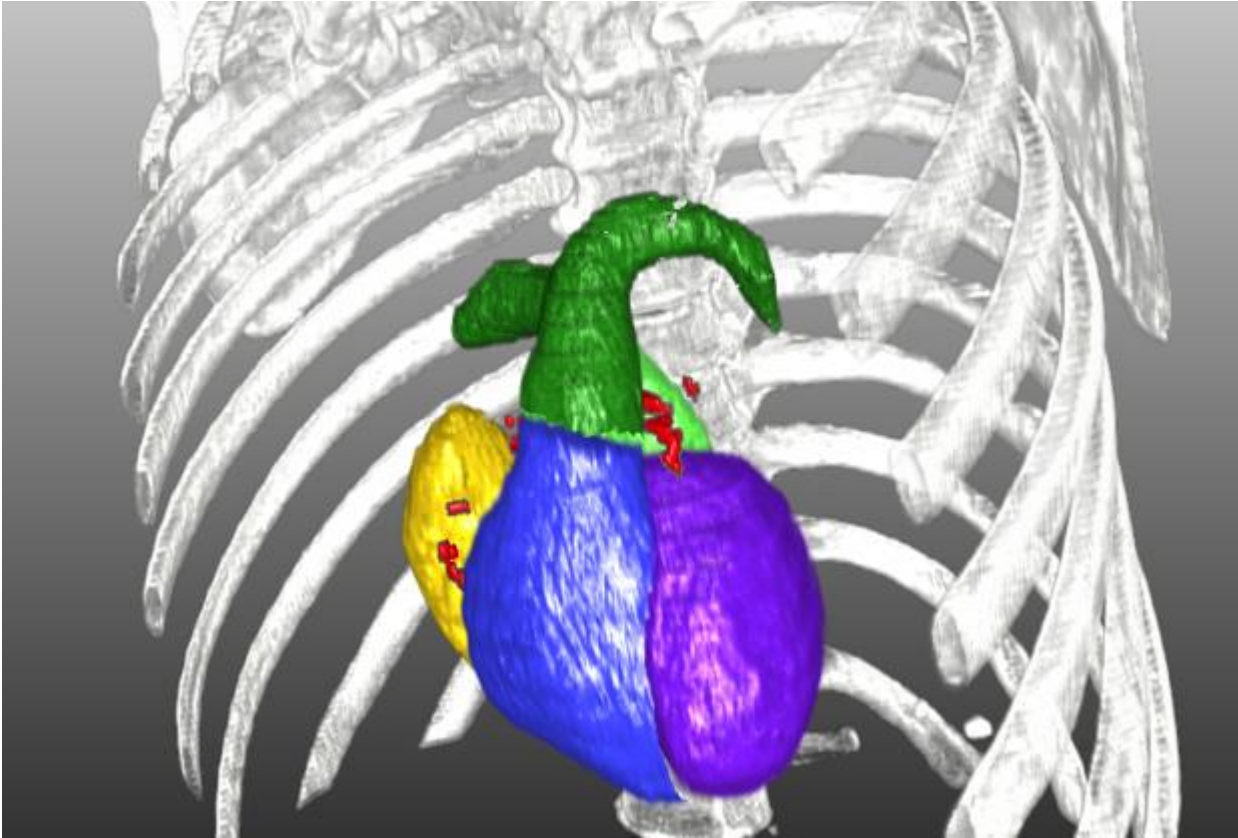

Supplemental Figure 10: Three-dimensional segmented cardiac volumes for a patient. Left ventricular myocardium (purple), right ventricle (blue), right atrium (yellow) , left atrium (light green) were segmented using TotalSegmentator. Coronary calcium (red) was segmented using a convolutional long-short term memory deep learning model.

Supplemental Figure 11

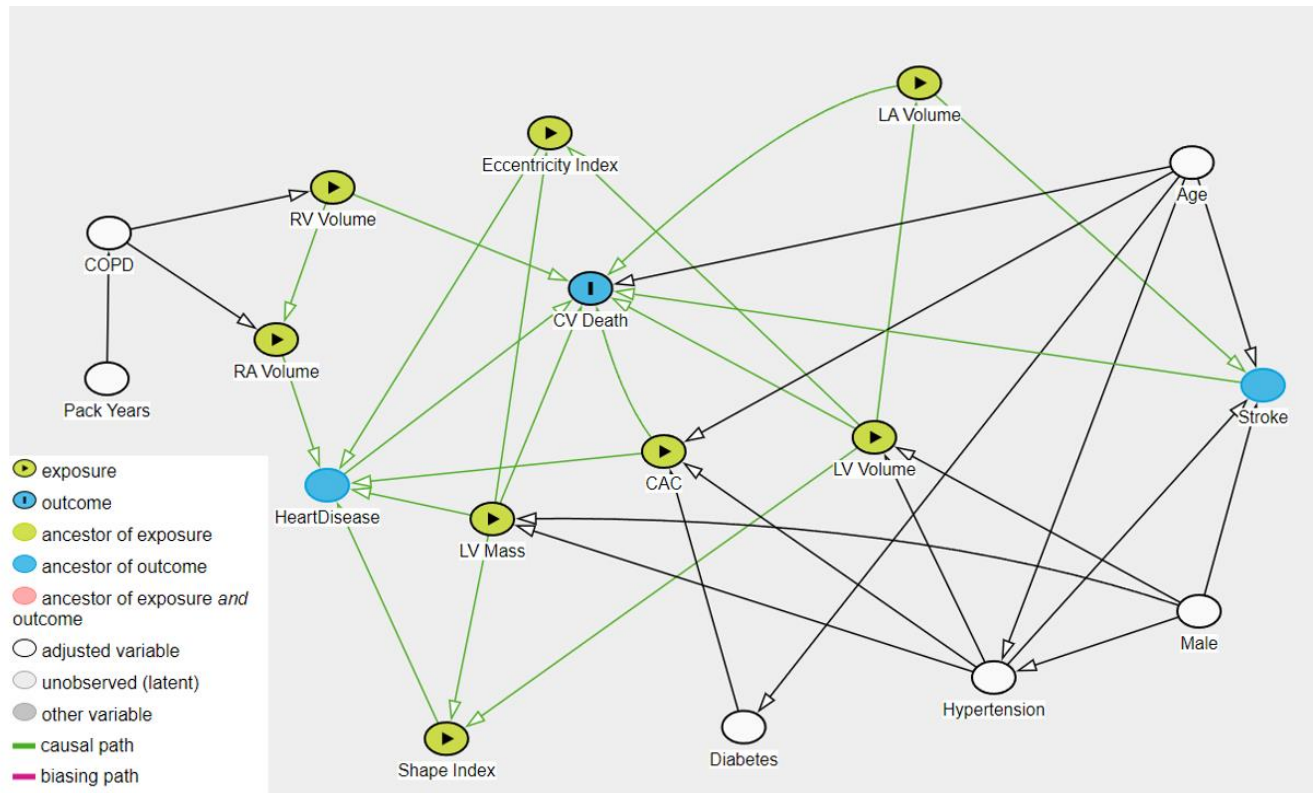

Supplemental Figure 11: Directed acyclic graph outlining suspected relationships between variables and cardiovascular mortality. Colors defined in embedded figure legend. CAC – coronary artery calcium, COPD – chronic obstructive pulmonary disease, CV – cardiovascular, LA – left atrium, LV – left ventricle, RA – right atrium, RV – right ventricle.

Supplemental Table 1

|                                                     | All-Cause Mortality       |         | Cardiovascular Mortality     |         |
|-----------------------------------------------------|---------------------------|---------|------------------------------|---------|
|                                                     | Unadjusted HR<br>(95% CI) | p-value | Unadjusted subHR<br>(95% CI) | p-value |
| CAC 0                                               | Reference                 | --      | Reference                    | --      |
| CAC 1 – 100                                         | 1.38 (1.17 – 1.64)        | <0.001  | 1.74 (1.13 – 2.67)           | <0.001  |
| CAC 101 – 400                                       | 2.16 (1.81 – 2.58)        | <0.001  | 3.62 (2.37 – 5.54)           | <0.001  |
| CAC > 400                                           | 3.33 (2.83 – 3.92)        | <0.001  | 7.07 (4.75 – 10.5)           | <0.001  |
| Left ventricular volume (per 10 mL)                 | 1.09 (1.07 – 1.10)        | <0.001  | 1.15 (1.11 – 1.19)           | <0.001  |
| Right ventricular volume (per 10 mL)                | 1.04 (1.03 – 1.06)        | <0.001  | 1.08 (1.06 – 1.11)           | <0.001  |
| Left atrial volume (per 10 mL)                      | 1.13 (1.11 – 1.15)        | <0.001  | 1.18 (1.14 – 1.22)           | <0.001  |
| Right atrial volume (per 10 mL)                     | 1.08 (1.06 – 1.10)        | <0.001  | 1.12 (1.09 – 1.15)           | <0.001  |
| LV myocardial mass index (per 10 g/m <sup>2</sup> ) | 1.26 (1.23 – 1.30)        | <0.001  | 1.46 (1.38 – 1.54)           | <0.001  |
| Shape index (per 0.1)                               | 1.31 (1.20 – 1.43)        | <0.001  | 1.68 (1.40 – 2.01)           | <0.001  |
| Eccentricity index (per 0.1)                        | 0.64 (0.55 – 0.74)        | <0.001  | 0.45 (0.34 – 0.61)           | <0.001  |
| Age (per 10 years)                                  | 2.22 (2.03 – 2.41)        | <0.001  | 2.27 (1.91 – 2.69)           | <0.001  |
| Male                                                | 1.62 (1.47 – 1.79)        | <0.001  | 1.82 (1.49 – 2.39)           | <0.001  |
| Pack years smoking (per 10 years)                   | 1.11 (1.09 – 1.13)        | <0.001  | 1.11 (1.08 – 1.14)           | <0.001  |
| Hypertension                                        | 1.37 (1.25 – 1.50)        | <0.001  | 1.81 (1.51 – 2.17)           | <0.001  |
| Diabetes                                            | 1.95 (1.72 – 2.21)        | <0.001  | 2.25 (1.78 – 2.84)           | <0.001  |
| Heart Disease                                       | 1.95 (1.74 – 2.18)        | <0.001  | 2.84 (2.32 – 3.47)           | <0.001  |
| COPD                                                | 2.19 (1.88 – 2.55)        | <0.001  | 1.74 (1.26 – 2.42)           | 0.001   |
| Stroke                                              | 2.30 (1.89 – 2.79)        | <0.001  | 3.29 (2.37 – 4.57)           | <0.001  |

Supplemental Table 1: Unadjusted associations with all-cause mortality and cardiovascular mortality. Associations with all-cause mortality evaluated using Cox proportional hazards model and cardiovascular mortality assessed with Fine-Gray competing risk model with no adjustment for multiple comparisons. CAC – coronary artery calcification, CI – confidence interval, COPD – chronic obstructive pulmonary disease, HR – hazard ratio, LV – left ventricle, subHR – subdistribution hazard ratio.

Supplemental Table 2

|                                          | Adjusted HR (95% CI) | p-value   |
|------------------------------------------|----------------------|-----------|
| CAC 0                                    | Reference            | Reference |
| CAC 1 – 100                              | 1.24 (1.04 - 1.47)   | 0.015     |
| CAC 101 – 400                            | 1.56 (1.30 - 1.87)   | <0.001    |
| CAC > 400                                | 1.88 (1.57 - 2.24)   | <0.001    |
| Left ventricular volume (per 10 mL)      | 0.94 (0.88 - 0.99)   | 0.024     |
| Right ventricular volume (per 10 mL)     | 0.95 (0.92 - 0.99)   | 0.004     |
| Left atrial volume (per 10 mL)           | 1.11 (1.06 - 1.16)   | <0.001    |
| Right atrial volume (per 10 mL)          | 0.95 (0.91 - 0.99)   | 0.027     |
| LV mass index (per 10 g/m <sup>2</sup> ) | 1.34 (1.22 - 1.47)   | <0.001    |
| Shape index (per 0.1)                    | 1.31 (1.02 - 1.66)   | 0.031     |
| Eccentricity index (per 0.1)             | 1.31 (0.86 - 1.99)   | 0.202     |
| Age (per 10 years)                       | 1.59 (1.44 - 1.75)   | <0.001    |
| Male                                     | 1.28 (1.12 - 1.46)   | <0.001    |
| Pack years smoking (per 10 years)        | 1.06 (1.04 - 1.07)   | <0.001    |
| Hypertension                             | 0.99 (0.90 - 1.1)    | 0.907     |
| Diabetes                                 | 1.53 (1.34 - 1.74)   | <0.001    |
| Heart disease                            | 1.08 (0.95 - 1.22)   | 0.223     |
| COPD                                     | 1.96 (1.68 - 2.30)   | <0.001    |
| Stroke                                   | 1.54 (1.26 - 1.88)   | <0.001    |

Supplemental Table 2: Associations with all-cause mortality. Associations evaluated using Cox proportional hazards model with no adjustment for multiple comparisons. CAC – coronary artery calcification, CI – confidence interval, COPD – chronic obstructive pulmonary disease, HR – hazard ratio, LV – left ventricle.

Supplemental Table 3

|                                               | No History of Heart Disease |         | History of Heart Disease   |         |
|-----------------------------------------------|-----------------------------|---------|----------------------------|---------|
|                                               | Adjusted subHR<br>(95% CI)  | p-value | Adjusted subHR<br>(95% CI) | p-value |
| CAC 0                                         | Reference                   | --      | Reference                  | --      |
| CAC 1 – 100                                   | 1.58 (0.99 - 2.53)          | 0.054   | 0.96 (0.31 - 2.94)         | 0.942   |
| CAC 101 – 400                                 | 2.84 (1.76 - 4.59)          | <0.001  | 0.92 (0.31 - 2.76)         | 0.883   |
| CAC > 400                                     | 3.85 (2.39 - 6.21)          | <0.001  | 1.39 (0.50 - 3.87)         | 0.527   |
| Left ventricular volume (per 10 mL)           | 1.18 (1.03 - 1.36)          | 0.018   | 1.02 (0.87 - 1.2)          | 0.798   |
| Right ventricular volume (per 10 mL)          | 0.88 (0.81 - 0.96)          | 0.002   | 0.97 (0.86 - 1.11)         | 0.678   |
| Left atrial volume (per 10 mL)                | 1.19 (1.07 - 1.32)          | 0.001   | 1.08 (0.95 - 1.23)         | 0.223   |
| Right atrial volume (per 10 mL)               | 0.86 (0.77 - 0.95)          | 0.005   | 0.92 (0.81 - 1.05)         | 0.217   |
| LV myocardial mass (per 10 g/m <sup>2</sup> ) | 1.17 (0.92 - 1.48)          | 0.200   | 1.37 (1.04 - 1.80)         | 0.025   |
| Shape index (per 0.1)                         | 1.34 (0.70 - 2.53)          | 0.375   | 1.92 (0.89 - 4.16)         | 0.097   |
| Eccentricity index (per 0.1)                  | 1.57 (0.52 - 4.80)          | 0.426   | 1.90 (0.49 - 7.34)         | 0.353   |
| Age (per 10 years)                            | 1.56 (1.24 - 1.96)          | <0.001  | 1.13 (0.77 - 1.65)         | 0.547   |
| Male                                          | 1.16 (0.85 - 1.56)          | 0.350   | 0.91 (0.54 - 1.52)         | 0.710   |
| Pack years smoking (per 10 years)             | 1.04 (1.00 - 1.08)          | 0.048   | 1.04 (0.97 - 1.11)         | 0.307   |
| Hypertension                                  | 1.16 (0.92 - 1.47)          | 0.214   | 0.94 (0.66 - 1.36)         | 0.756   |
| Diabetes                                      | 1.22 (0.87 - 1.71)          | 0.247   | 1.68 (1.14 - 2.47)         | 0.009   |
| COPD                                          | 1.79 (1.19 - 2.72)          | 0.006   | 1.37 (0.75 - 2.49)         | 0.308   |
| Stroke                                        | 2.27 (1.49 - 3.45)          | <0.001  | 1.45 (0.79 - 2.64)         | 0.228   |

Supplemental Table 3: Associations with cardiovascular mortality in patients with and without a history of heart disease from multivariable analyses. Associations evaluated using Fine-Gray competing risk model with no adjustment for multiple comparisons. CAC – coronary artery calcification, CI – confidence interval, COPD – chronic obstructive pulmonary disease, LV – left ventricle, subHR – subhazard ratio.

Supplemental Table 4

|                                               | Adjusted subHR (95% CI) | p-value   |
|-----------------------------------------------|-------------------------|-----------|
| CAC 0                                         | Reference               | Reference |
| CAC 1 – 100                                   | 1.50 (0.96 - 2.34)      | 0.072     |
| CAC 101 – 400                                 | 2.49 (1.58 - 3.93)      | <0.001    |
| CAC > 400                                     | 3.53 (2.24 - 5.56)      | <0.001    |
| Left ventricular volume (per 10 mL)           | 1.16 (1.03 - 1.30)      | 0.014     |
| Right ventricular volume (per 10 mL)          | 0.89 (0.83 - 0.97)      | 0.005     |
| Left atrial volume (per 10 mL)                | 1.13 (1.03 - 1.24)      | 0.01      |
| Right atrial volume (per 10 mL)               | 0.89 (0.81 - 0.98)      | 0.013     |
| LV myocardial mass (per 10 g/m <sup>2</sup> ) | 1.23 (1.02 - 1.49)      | 0.033     |
| Shape index (per 0.1)                         | 1.49 (0.85 - 2.61)      | 0.168     |
| Eccentricity index (per 0.1)                  | 1.73 (0.63 - 4.72)      | 0.287     |
| Age (per 10 years)                            | 1.37 (1.11 - 1.70)      | 0.003     |
| Male                                          | 1.14 (0.86 - 1.52)      | 0.358     |
| Pack years smoking (per 10 years)             | 1.06 (1.02 - 1.09)      | 0.002     |
| Hypertension                                  | 1.14 (0.92 - 1.41)      | 0.235     |
| Diabetes                                      | 1.35 (1.02 - 1.77)      | 0.034     |
| Heart disease                                 | 1.06 (0.83 - 1.37)      | 0.628     |
| COPD                                          | 1.76 (1.23 - 2.52)      | 0.002     |
| Stroke                                        | 2.03 (1.40 - 2.94)      | <0.001    |

Supplemental Table 4: Associations with cardiovascular mortality in patients without reported cardiovascular abnormalities from multivariable model. Associations evaluated using Fine-Gray competing risk model with no adjustment for multiple comparisons. CAC – coronary artery calcification, CI – confidence interval, COPD – chronic obstructive pulmonary disease, LV – left ventricle, subHR – subhazard ratio.

Supplemental Table 5

|                                               | Tube voltage 120 kVp<br>n=394/21287 |         | Tube voltage 140 kVp<br>n=58/2313 |         |
|-----------------------------------------------|-------------------------------------|---------|-----------------------------------|---------|
|                                               | Unadjusted subHR<br>(95% CI)        | p-value | Unadjusted subHR<br>(95% CI)      | p-value |
| CAC 0                                         | Reference                           | --      | Reference                         | --      |
| CAC 1 – 100                                   | 2.07 (1.26 – 3.37)                  | 0.004   | 0.81 (0.32 – 2.02)                | 0.648   |
| CAC 101 – 400                                 | 4.34 (2.67 – 7.06)                  | <0.001  | 1.44 (0.56 – 3.70)                | 0.454   |
| CAC > 400                                     | 8.40 (5.31 – 13.3)                  | <0.001  | 3.12 (1.36 – 7.17)                | 0.007   |
| Left ventricular volume (per 10 mL)           | 1.15 (1.11 – 1.19)                  | <0.001  | 1.17 (1.09 – 1.25)                | <0.001  |
| Right ventricular volume (per 10 mL)          | 1.08 (1.06 – 1.11)                  | <0.001  | 1.09 (1.01 – 1.16)                | 0.018   |
| Left atrial volume (per 10 mL)                | 1.17 (1.13 – 1.22)                  | <0.001  | 1.20 (1.08 – 1.34)                | 0.001   |
| Right atrial volume (per 10 mL)               | 1.12 (1.09 – 1.15)                  | <0.001  | 1.10 (0.98 – 1.23)                | 0.099   |
| LV myocardial mass (per 10 g/m <sup>2</sup> ) | 1.46 (1.37 – 1.55)                  | <0.001  | 1.43 (1.27 – 1.60)                | <0.001  |
| Shape index (per 0.1)                         | 1.64 (1.35 – 1.99)                  | <0.001  | 2.27 (1.33 – 3.90)                | 0.001   |
| Eccentricity index (per 0.1)                  | 0.46 (0.34 – 0.64)                  | <0.001  | 0.32 (0.14 – 0.72)                | 0.004   |

Supplemental Table 5: Associations with cardiovascular mortality stratified by tube voltage. There were no statistically significant interactions between tube voltage category and risk from imaging variables (all interaction p-values > 0.05 after Bonferroni correction). Associations evaluated using Fine-Gray competing risk model, only interaction tests were adjusted multiple comparisons. CAC – coronary artery calcification, CI – confidence interval, COPD – chronic obstructive pulmonary disease, LV – left ventricle, subHR – subhazard ratio.

Supplemental Table 6

|                                               | Slice thickness<2.5mm<br>n=199/9443 |         | Slice thickness 2.5mm<br>n=207/11417 |         | Slice thickness>2.5mm<br>n=53/3494 |         |
|-----------------------------------------------|-------------------------------------|---------|--------------------------------------|---------|------------------------------------|---------|
|                                               | Unadjusted<br>subHR (95% CI)        | p-value | Unadjusted<br>subHR<br>(95% CI)      | p-value | Unadjusted<br>subHR<br>(95% CI)    | p-value |
| CAC 0                                         | Reference                           | --      | Reference                            | --      | Reference                          | --      |
| CAC 1 – 100                                   | 3.07 (1.30 – 7.22)                  | 0.010   | 1.19 (0.69 – 2.06)                   | 0.527   | 2.57 (0.56 – 11.7)                 | 0.223   |
| CAC 101 – 400                                 | 5.38 (2.28 – 12.7)                  | <0.001  | 2.63 (1.53 – 4.51)                   | <0.001  | 7.47 (1.73 – 32.3)                 | 0.007   |
| CAC > 400                                     | 11.1 (4.87 – 25.2)                  | <0.001  | 5.62 (3.45 – 9.15)                   | <0.001  | 8.98 (2.12 – 38.0)                 | 0.003   |
| Left ventricular volume (per 10 mL)           | 1.20 (1.15 – 1.25)                  | <0.001  | 1.13 (1.09 – 1.17)                   | <0.001  | 1.24 (1.16 – 1.33)                 | <0.001  |
| Right ventricular volume (per 10 mL)          | 1.10 (1.06 – 1.13)                  | <0.001  | 1.07 (1.04 – 1.10)                   | <0.001  | 1.14 (1.05 – 1.23)                 | <0.001  |
| Left atrial volume (per 10 mL)                | 1.16 (1.11 – 1.22)                  | <0.001  | 1.17 (1.12 – 1.23)                   | <0.001  | 1.35 (1.23 – 1.48)                 | <0.001  |
| Right atrial volume (per 10 mL)               | 1.11 (1.07 – 1.16)                  | <0.001  | 1.11 (1.06 – 1.16)                   | <0.001  | 1.22 (1.08 – 1.37)                 | <0.001  |
| LV myocardial mass (per 10 g/m <sup>2</sup> ) | 1.50 (1.38 – 1.64)                  | <0.001  | 1.42 (1.32 – 1.53)                   | <0.001  | 1.52 (1.33 – 1.75)                 | <0.001  |
| Shape index (per 0.1)                         | 1.45 (1.10 – 1.92)                  | 0.009   | 2.16 (1.68 – 2.75)                   | <0.001  | 0.86 (0.52 – 1.41)                 | 0.556   |
| Eccentricity index (per 0.1)                  | 0.57 (0.36 – 0.91)                  | 0.017   | 0.31 (0.21 – 0.47)                   | <0.001  | 1.19 (0.53 – 2.68)                 | 0.677   |

Supplemental Table 6: Associations with cardiovascular mortality stratified by slice thickness. There were no statistically significant interactions between slice thickness and risk from imaging variables (all interaction p-values>0.05 after Bonferroni correction). Associations evaluated using Fine-Gray competing risk model, only interaction tests were adjusted multiple comparisons. CAC – coronary artery calcification, CI – confidence interval, COPD – chronic obstructive pulmonary disease, LV – left ventricle, subHR – subhazard ratio.

Supplemental Table 7

**Coronary Artery Calcium**

|                                          | Low<br>( $<0.5\%/year$ ) | Intermediate<br>( $0.5-1\%/year$ ) | High<br>( $\geq 1\%/year$ ) |                              |        |
|------------------------------------------|--------------------------|------------------------------------|-----------------------------|------------------------------|--------|
| Without Events                           |                          |                                    |                             |                              |        |
| Low ( $<0.5\%/year$ )                    | 19114                    | 3250                               | 26                          | Decreased Risk               | 0.027  |
| Intermediate ( $0.5-1\%/year$ )          | 646                      | 793                                | 66                          | Increased Risk               | 0.140  |
| High ( $\geq 1\%/year$ )                 | 0                        | 0                                  | 0                           | Net Reclassification         | -0.113 |
| With Events                              |                          |                                    |                             |                              |        |
| Low ( $<0.5\%/year$ )                    | 242                      | 159                                | 2                           | Decreased Risk               | 0.039  |
| Intermediate ( $0.5-1\%/year$ )          | 18                       | 36                                 | 2                           | Increased Risk               | 0.355  |
| High ( $\geq 1\%/year$ )                 | 0                        | 0                                  | 0                           | Net Reclassification         | 0.316  |
| <b>Overall Reclassification (95% CI)</b> |                          |                                    |                             | <b>0.203 (0.153 – 0.253)</b> |        |

**Cardiac Volumes**

|                                          | Low<br>( $<0.5\%/year$ ) | Intermediate<br>( $0.5-1\%/year$ ) | High<br>( $\geq 1\%/year$ ) |                              |        |
|------------------------------------------|--------------------------|------------------------------------|-----------------------------|------------------------------|--------|
| Without Events                           |                          |                                    |                             |                              |        |
| Low ( $<0.5\%/year$ )                    | 21100                    | 1025                               | 265                         | Decreased Risk               | 0.044  |
| Intermediate ( $0.5-1\%/year$ )          | 1049                     | 348                                | 108                         | Increased Risk               | 0.059  |
| High ( $\geq 1\%/year$ )                 | 0                        | 0                                  | 0                           | Net Reclassification         | -0.015 |
| With Events                              |                          |                                    |                             |                              |        |
| Low ( $<0.5\%/year$ )                    | 297                      | 60                                 | 46                          | Decreased Risk               | 0.065  |
| Intermediate ( $0.5-1\%/year$ )          | 30                       | 14                                 | 12                          | Increased Risk               | 0.257  |
| High ( $\geq 1\%/year$ )                 | 0                        | 0                                  | 0                           | Net Reclassification         | 0.192  |
| <b>Overall Reclassification (95% CI)</b> |                          |                                    |                             | <b>0.177 (0.128 – 0.226)</b> |        |

**Shape/Eccentricity Index**

|                                          | Low<br>( $<0.5\%/year$ ) | Intermediate<br>( $0.5-1\%/year$ ) | High<br>( $\geq 1\%/year$ ) |                               |       |
|------------------------------------------|--------------------------|------------------------------------|-----------------------------|-------------------------------|-------|
| Without Events                           |                          |                                    |                             |                               |       |
| Low ( $<0.5\%/year$ )                    | 22147                    | 238                                | 5                           | Decreased Risk                | 0.026 |
| Intermediate ( $0.5-1\%/year$ )          | 614                      | 864                                | 27                          | Increased Risk                | 0.011 |
| High ( $\geq 1\%/year$ )                 | 0                        | 0                                  | 0                           | Net Reclassification          | 0.014 |
| With Events                              |                          |                                    |                             |                               |       |
| Low ( $<0.5\%/year$ )                    | 385                      | 17                                 | 1                           | Decreased Risk                | 0.031 |
| Intermediate ( $0.5-1\%/year$ )          | 14                       | 40                                 | 2                           | Increased Risk                | 0.044 |
| High ( $\geq 1\%/year$ )                 | 0                        | 0                                  | 0                           | Net Reclassification          | 0.013 |
| <b>Overall Reclassification (95% CI)</b> |                          |                                    |                             | <b>0.028 (0.0003 – 0.053)</b> |       |

**LV Mass Index**

|                                          | Low<br>( $<0.5\%/year$ ) | Intermediate<br>( $0.5-1\%/year$ ) | High<br>( $\geq 1\%/year$ ) |                              |        |
|------------------------------------------|--------------------------|------------------------------------|-----------------------------|------------------------------|--------|
| Without Events                           |                          |                                    |                             |                              |        |
| Low ( $<0.5\%/year$ )                    | 20974                    | 1225                               | 191                         | Decreased Risk               | 0.041  |
| Intermediate ( $0.5-1\%/year$ )          | 974                      | 433                                | 98                          | Increased Risk               | 0.063  |
| High ( $\geq 1\%/year$ )                 | 0                        | 0                                  | 0                           | Net Reclassification         | -0.023 |
| With Events                              |                          |                                    |                             |                              |        |
| Low ( $<0.5\%/year$ )                    | 315                      | 48                                 | 40                          | Decreased Risk               | 0.059  |
| Intermediate ( $0.5-1\%/year$ )          | 27                       | 17                                 | 12                          | Increased Risk               | 0.218  |
| High ( $\geq 1\%/year$ )                 | 0                        | 0                                  | 0                           | Net Reclassification         | 0.159  |
| <b>Overall Reclassification (95% CI)</b> |                          |                                    |                             | <b>0.136 (0.090 – 0.183)</b> |        |

**Combined Model**

|                                          | Low<br>( $<0.5\%/year$ ) | Intermediate<br>( $0.5-1\%/year$ ) | High<br>( $\geq 1\%/year$ ) |                              |        |
|------------------------------------------|--------------------------|------------------------------------|-----------------------------|------------------------------|--------|
| Without Events                           |                          |                                    |                             |                              |        |
| Low ( $<0.5\%/year$ )                    | 19959                    | 1929                               | 502                         | Decreased Risk               | 0.040  |
| Intermediate ( $0.5-1\%/year$ )          | 952                      | 411                                | 73                          | Increased Risk               | 0.105  |
| High ( $\geq 1\%/year$ )                 | 0                        | 0                                  | 0                           | Net Reclassification         | -0.065 |
| With Events                              |                          |                                    |                             |                              |        |
| Low ( $<0.5\%/year$ )                    | 241                      | 86                                 | 76                          | Decreased Risk               | 0.059  |
| Intermediate ( $0.5-1\%/year$ )          | 27                       | 14                                 | 15                          | Increased Risk               | 0.386  |
| High ( $\geq 1\%/year$ )                 | 0                        | 0                                  | 0                           | Net Reclassification         | 0.327  |
| <b>Overall Reclassification (95% CI)</b> |                          |                                    |                             | <b>0.259 (0.206 – 0.312)</b> |        |

Supplemental Table 7: Net-reclassification analysis for cardiovascular mortality of coronary artery calcium (CAC), cardiac chamber volumes, shape and eccentricity index, left ventricular (LV) mass index, and the combination of all measurements when considered in addition to cardiovascular abnormality identified by a radiologist. Variables were modeled as continuous variables and combined using logistic regression analyses. Red shows patients reclassified to higher risk by one (light) or two (dark) categories, with blue showing patients recategorized to lower risk by one (light) or two (dark) categories. CI – confidence interval.

Supplemental Table 8

| <b>Coronary Artery Calcium</b>  | Low<br>( $<0.5\%/year$ )                 | Intermediate<br>( $0.5-1\%/year$ ) | High<br>( $\geq 1\%/year$ ) |                               |        |
|---------------------------------|------------------------------------------|------------------------------------|-----------------------------|-------------------------------|--------|
| Low ( $<0.5\%/year$ )           | 19645                                    | 1396                               | 3                           | Decreased Risk                | 0.031  |
| Intermediate ( $0.5-1\%/year$ ) | 599                                      | 1468                               | 267                         | Increased Risk                | 0.070  |
| High ( $\geq 1\%/year$ )        | 26                                       | 123                                | 368                         | Net Reclassification          | -0.038 |
|                                 | Low<br>( $<0.5\%/year$ )                 | Intermediate<br>( $0.5-1\%/year$ ) | High ( $\geq 1\%/year$ )    |                               |        |
| Low ( $<0.5\%/year$ )           | 247                                      | 69                                 | 0                           | Decreased Risk                | 0.044  |
| Intermediate ( $0.5-1\%/year$ ) | 13                                       | 60                                 | 26                          | Increased Risk                | 0.207  |
| High ( $\geq 1\%/year$ )        | 1                                        | 6                                  | 37                          | Net Reclassification          | 0.163  |
|                                 | <b>Overall Reclassification (95% CI)</b> |                                    |                             | <b>0.125 (0.0582 – 0.168)</b> |        |
| <b>Cardiac Volumes</b>          | Low<br>( $<0.5\%/year$ )                 | Intermediate<br>( $0.5-1\%/year$ ) | High<br>( $\geq 1\%/year$ ) |                               |        |
| Low ( $<0.5\%/year$ )           | 20213                                    | 708                                | 123                         | Decreased Risk                | 0.057  |
| Intermediate ( $0.5-1\%/year$ ) | 1125                                     | 943                                | 266                         | Increased Risk                | 0.046  |
| High ( $\geq 1\%/year$ )        | 29                                       | 199                                | 289                         | Net Reclassification          | 0.011  |
|                                 | Low<br>( $<0.5\%/year$ )                 | Intermediate<br>( $0.5-1\%/year$ ) | High ( $\geq 1\%/year$ )    |                               |        |
| Low ( $<0.5\%/year$ )           | 248                                      | 45                                 | 23                          | Decreased Risk                | 0.072  |
| Intermediate ( $0.5-1\%/year$ ) | 23                                       | 45                                 | 31                          | Increased Risk                | 0.216  |
| High ( $\geq 1\%/year$ )        | 2                                        | 8                                  | 34                          | Net Reclassification          | 0.144  |
|                                 | <b>Overall Reclassification (95% CI)</b> |                                    |                             | <b>0.155 (0.107 – 0.202)</b>  |        |
| <b>Shape/Eccentricity Index</b> | Low<br>( $<0.5\%/year$ )                 | Intermediate<br>( $0.5-1\%/year$ ) | High<br>( $\geq 1\%/year$ ) |                               |        |
| Low ( $<0.5\%/year$ )           | 20584                                    | 460                                | 0                           | Decreased Risk                | 0.022  |
| Intermediate ( $0.5-1\%/year$ ) | 418                                      | 1777                               | 139                         | Increased Risk                | 0.025  |
| High ( $\geq 1\%/year$ )        | 0                                        | 102                                | 415                         | Net Reclassification          | -0.003 |
|                                 | Low<br>( $<0.5\%/year$ )                 | Intermediate<br>( $0.5-1\%/year$ ) | High ( $\geq 1\%/year$ )    |                               |        |
| Low ( $<0.5\%/year$ )           | 302                                      | 14                                 | 0                           | Decreased Risk                | 0.026  |
| Intermediate ( $0.5-1\%/year$ ) | 8                                        | 72                                 | 19                          | Increased Risk                | 0.072  |
| High ( $\geq 1\%/year$ )        | 0                                        | 4                                  | 40                          | Net Reclassification          | 0.046  |
|                                 | <b>Overall Reclassification (95% CI)</b> |                                    |                             | <b>0.042 (0.014 – 0.071)</b>  |        |
| <b>LV Mass Index</b>            | Low<br>( $<0.5\%/year$ )                 | Intermediate<br>( $0.5-1\%/year$ ) | High<br>( $\geq 1\%/year$ ) |                               |        |
| Low ( $<0.5\%/year$ )           | 20244                                    | 706                                | 94                          | Decreased Risk                | 0.052  |
| Intermediate ( $0.5-1\%/year$ ) | 1036                                     | 1058                               | 240                         | Increased Risk                | 0.044  |
| High ( $\geq 1\%/year$ )        | 13                                       | 196                                | 308                         | Net Reclassification          | 0.009  |
|                                 | Low<br>( $<0.5\%/year$ )                 | Intermediate<br>( $0.5-1\%/year$ ) | High ( $\geq 1\%/year$ )    |                               |        |
| Low ( $<0.5\%/year$ )           | 257                                      | 41                                 | 18                          | Decreased Risk                | 0.070  |
| Intermediate ( $0.5-1\%/year$ ) | 25                                       | 47                                 | 27                          | Increased Risk                | 0.187  |
| High ( $\geq 1\%/year$ )        | 1                                        | 6                                  | 37                          | Net Reclassification          | 0.118  |
|                                 | <b>Overall Reclassification (95% CI)</b> |                                    |                             | <b>0.126 (0.081 – 0.172)</b>  |        |
| <b>Combined Model</b>           | Low<br>( $<0.5\%/year$ )                 | Intermediate<br>( $0.5-1\%/year$ ) | High<br>( $\geq 1\%/year$ ) |                               |        |
| Low ( $<0.5\%/year$ )           | 20141                                    | 714                                | 56                          | Decreased Risk                | 0.040  |
| Intermediate ( $0.5-1\%/year$ ) | 788                                      | 1305                               | 247                         | Increased Risk                | 0.043  |
| High ( $\geq 1\%/year$ )        | 0                                        | 156                                | 488                         | Net Reclassification          | -0.003 |

|                                          | Low<br>(<0.5%/year) | Intermediate<br>(0.5-1%/year) | High (≥1%/year) |                              |       |
|------------------------------------------|---------------------|-------------------------------|-----------------|------------------------------|-------|
| Low (<0.5%/year)                         | 236                 | 27                            | 5               | Decreased Risk               | 0.059 |
| Intermediate (0.5-1%/year)               | 15                  | 64                            | 21              | Increased Risk               | 0.115 |
| High (≥1%/year)                          | 0                   | 12                            | 79              | Net Reclassification         | 0.057 |
| <b>Overall Reclassification (95% CI)</b> |                     |                               |                 | <b>0.054 (0.016 – 0.092)</b> |       |

Supplemental Table 8: Net-reclassification analysis for cardiovascular mortality of coronary artery calcium (CAC), cardiac chamber volumes, shape and eccentricity index, left ventricular (LV) mass index, and the combination of all measurements when considered in addition to a multivariable model including age, sex, smoking history, and past medical history. Variables were modeled as continuous variables and combined using logistic regression analyses. Red shows patients reclassified to higher risk by one (light) or two (dark) categories, with blue showing patients recategorized to lower risk by one (light) or two (dark) categories. CI – confidence interval.

Supplemental Table 9

|                       | No events<br>(N=1940) | Cardiac death or<br>myocardial infarction<br>(n=74) | p-value |
|-----------------------|-----------------------|-----------------------------------------------------|---------|
| Age                   | 56 (49, 62)           | 60 (50, 72)                                         | <0.001  |
| Male                  | 1140 (58.8%)          | 50 (67.6%)                                          | 0.131   |
| Past Medical History  |                       |                                                     |         |
| Hypertension          | 765 (39.4%)           | 46 (62.2%)                                          | <0.001  |
| Diabetes              | 108 (5.6%)            | 5 (6.8%)                                            | 0.660   |
| Dyslipidemia          | 1,344 (69.3%)         | 52 (70.3%)                                          | 0.899   |
| Family history of CAD | 583 (30.1%)           | 27 (36.5%)                                          | 0.242   |
| Smoking               | 117 (6.0%)            | 6 (8.1%)                                            | 0.461   |
| CAC Category          |                       |                                                     | <0.001  |
| CAC 0                 | 890 (45.9%)           | 10 (13.5%)                                          |         |
| CAC 1-100             | 707 (36.4%)           | 23 (31.1%)                                          |         |
| CAC 101-400           | 218 (11.2%)           | 21 (28.4%)                                          |         |
| CAC>400               | 125 (6.4%)            | 20 (27.0%)                                          |         |
| LV volume (mL)        | 95.6 (79.2, 114.2)    | 100.3 (88.2, 116.1)                                 | 0.055   |
| LA volume (mL)        | 60.6 (51.7, 72.1)     | 67.9 (60.4, 78.9)                                   | <0.001  |
| RV volume (mL)        | 124.2 (97.1, 153.5)   | 125.5 (100.6, 147.8)                                | 0.700   |
| RA volume (mL)        | 78.7 (67.4, 92.2)     | 86.5 (75.1, 102.3)                                  | <0.001  |
| LV mass (g)           | 106.3 (86.1, 126.5)   | 114.1(98.4, 129.5)                                  | 0.016   |
| Shape Index           | 0.79 (0.75, 0.83)     | 0.78 (0.74, 0.83)                                   | 0.893   |
| Eccentricity Index    | 0.77 (0.74, 0.80)     | 0.77 (0.72, 0.80)                                   | 0.222   |

Supplemental Table 9. Population characteristics for the Early Identification of Subclinical Atherosclerosis by Noninvasive Imaging Research trial. Groups were compared using  $\chi^2$  tests for categorical variables and Mann-Whitney U test for continuous variables. CAC – coronary artery calcification, CAD – coronary artery disease, LA – left atrium, LV – left ventricle, RA – right atrium, RV – right ventricle.

Supplemental Table 10

|                                               | Unadjusted HR<br>(95% CI) | p-value | Adjusted HR<br>(95% CI) | p-value |
|-----------------------------------------------|---------------------------|---------|-------------------------|---------|
| CAC 0                                         | Reference                 |         | Reference               |         |
| CAC 1 – 100                                   | 2.83 (1.35 – 5.95)        | 0.006   | 2.44 (1.16 – 5.16)      | 0.019   |
| CAC 101 – 400                                 | 8.29 (3.90 – 17.6)        | <0.001  | 5.82 (2.68 – 12.7)      | <0.001  |
| CAC > 400                                     | 13.0 (6.10 – 27.8)        | <0.001  | 7.64 (3.41 – 17.1)      | <0.001  |
| Left ventricular volume (per 10 mL)           | 1.08 (1.00 – 1.17)        | 0.058   | --                      |         |
| Right ventricular volume (per 10 mL)          | 1.00 (0.94 – 1.05)        | 0.898   | 0.84 (0.74 – 0.95)      | 0.005   |
| Left atrial volume (per 10 mL)                | 1.33 (1.20 – 1.47)        | <0.001  | --                      |         |
| Right atrial volume (per 10 mL)               | 1.20 (1.09 – 1.33)        | <0.001  | 1.20 (1.05 – 1.38)      | 0.007   |
| LV myocardial mass (per 10 g/m <sup>2</sup> ) | 1.18 (1.00 – 1.40)        | 0.052   | 1.56 (1.10 – 2.20)      | 0.012   |
| Shape index (per 0.1)                         | 0.96 (0.66 – 1.40)        | 0.838   | --                      |         |
| Eccentricity index (per 0.1)                  | 0.63 (0.38 – 1.05)        | 0.075   | --                      |         |
| Age (per 10 years)                            | 2.13 (1.65 – 2.76)        | <0.001  | 1.37 (1.02 – 1.86)      | 0.038   |
| Male                                          | 1.43 (0.88 – 2.33)        | 0.150   | --                      |         |
| Hypertension                                  | 2.53 (1.58 – 4.05)        | <0.001  | --                      |         |
| Diabetes                                      | 1.26 (0.51 – 3.11)        | 0.623   | --                      |         |
| Dyslipidemia                                  | 1.05 (0.64 – 1.73)        | 0.840   | --                      |         |
| Smoking                                       | 1.36 (0.59 – 3.12)        | 0.475   | --                      |         |
| Family history                                | 1.35 (0.84 – 2.17)        | 0.211   | --                      |         |

Supplemental Table 10: Associations with cardiovascular death or myocardial infarction in the population from the Early Identification of Subclinical Atherosclerosis by Noninvasive Imaging Research trial. Given the limited number of events, a parsimonious multivariable model was developed using backward stepwise elimination until only variables with significant associations remained. Associations evaluated using Cox proportional hazards model, to account for multiple comparisons,  $p < 0.001$  is considered statistically significant. CAC – coronary artery calcium, CI – confidence interval, HR – hazard ratio

Supplemental Table 11

|                                             | Low<br>( $<0.25\%/year$ ) | Intermediate<br>( $0.25-0.5\%/year$ ) | High<br>( $\geq 0.5\%/year$ ) |                              |       |
|---------------------------------------------|---------------------------|---------------------------------------|-------------------------------|------------------------------|-------|
| Without Events                              |                           |                                       |                               |                              |       |
| Low ( $<0.25\%/year$ )                      | 1101                      | 87                                    | 48                            | Decreased Risk               | 0.178 |
| Intermediate ( $0.25-0.5\%/year$ )          | 239                       | 135                                   | 111                           | Increased Risk               | 0.127 |
| High ( $\geq 0.5\%/year$ )                  | 46                        | 61                                    | 112                           | Net Reclassification         | 0.052 |
| With Events                                 |                           |                                       |                               |                              |       |
| Low ( $<0.25\%/year$ )                      | 242                       | 159                                   | 2                             | Decreased Risk               | 0.135 |
| Intermediate ( $0.25-0.5\%/year$ )          | 18                        | 36                                    | 2                             | Increased Risk               | 0.270 |
| High ( $\geq 0.5\%/year$ )                  | 0                         | 0                                     | 0                             | Net Reclassification         | 0.135 |
| <b>Overall Reclassification (95% CI)</b>    |                           |                                       |                               | <b>0.187 (0.043 – 0.331)</b> |       |
| <b>Continuous Reclassification (95% CI)</b> |                           |                                       |                               | <b>0.778 (0.568 – 0.987)</b> |       |

Supplemental Table 11: Net-reclassification analysis for cardiac death or myocardial infarction. The predicted risk from clinical data (rows) is compared to the risk from a model combining clinical and imaging data (columns). The clinical model included age, sex, and medical history. The combined model included clinical data as well as deep learning-derived imaging variables (coronary artery calcium, cardiac volumes, shape index, eccentricity index, and left ventricular mass index). Red shows patients reclassified to higher risk by one (light) or two (dark) categories, with blue showing patients recategorized to lower risk by one (light) or two (dark) categories. CI – confidence interval.

Supplemental Table 12

|                            | EISNER<br>N=1240<br>30 (2.4%) CV death or MI | Low dose CT<br>N=913<br>32 (3.5%) death or MI |
|----------------------------|----------------------------------------------|-----------------------------------------------|
| AUC                        |                                              |                                               |
| Clinical                   | 0.731 (0.658 – 0.802)                        | 0.707 (0.613 – 0.801)                         |
| DL - Imaging               | 0.793 (0.727 – 0.858)                        | 0.739 (0.642 – 0.835)                         |
| Combined model             | 0.838 (0.777 – 0.898)*                       | 0.791 (0.709 – 0.872)*                        |
| Net Reclassification Index |                                              |                                               |
| Categorical                | 0.148 (-0.082 to 0.378)                      | 0.263 (0.067 – 0.460)                         |
| p-value                    | 0.208                                        | 0.009                                         |
| Continuous                 | 0.233 (-0.127 to 0.592)                      | 0.551 (0.210 – 0.892)                         |
| p-value                    | 0.204                                        | 0.002                                         |

Supplemental Table 12: Risk stratification for cardiac events in young (age <60) non-smokers. In the Early Identification of Subclinical Atherosclerosis by Noninvasive Imaging Research (EISNER) we evaluated cardiac (CV) death or myocardial infarction (MI). In the low dose computed tomography (CT) population we evaluated death or MI. \* -  $p < 0.01$  compared to clinical model using DeLong's test, AUC – area under the receiver operating characteristic curve, DL – deep learning.

Supplemental Table 13

|                       | No events<br>(N=3142) | Death or myocardial<br>infarction<br>(n=177) | p-value |
|-----------------------|-----------------------|----------------------------------------------|---------|
| Age                   | 65 (56, 73)           | 68 (60, 77)                                  | <0.001  |
| Male                  | 1746 (55.6%)          | 108 (61.0%)                                  | 0.160   |
| Past Medical History  |                       |                                              |         |
| Hypertension          | 1953 (62.2%)          | 107 (60.5%)                                  | 0.651   |
| Diabetes              | 1009 (32.1%)          | 82 (46.3%)                                   | <0.001  |
| Dyslipidemia          | 1512 (48.1%)          | 87 (49.2%)                                   | 0.792   |
| Family history of CAD | 481 (15.3%)           | 12 (6.8%)                                    | 0.002   |
| Smoking               | 506 (16.1%)           | 39 (22.0%)                                   | 0.038   |
| CAC Category          |                       |                                              | <0.001  |
| CAC 0                 | 1293 (41.2%)          | 42 (23.7%)                                   |         |
| CAC 1-100             | 518 (16.5%)           | 37 (20.9%)                                   |         |
| CAC 101-400           | 460 (14.6%)           | 28 (15.8%)                                   |         |
| CAC>400               | 871 (27.7%)           | 70 (39.5%)                                   |         |
| LV volume (mL)        | 118.4 (97.0, 143.3)   | 129.4 (107.8, 160.9)                         | <0.001  |
| LA volume (mL)        | 76.4 (62.4, 93.5)     | 85.0 (67.8, 105.4)                           | <0.001  |
| RV volume (mL)        | 152.9 (124.4, 186.2)  | 156.7 (131.9, 189.9)                         | 0.120   |
| RA volume (mL)        | 78.3 (63.4, 98.2)     | 82.4 (63.2, 111.4)                           | 0.161   |
| LV mass (g)           | 138.3 (112.6, 168.4)  | 148.0 (123.3, 185.2)                         | <0.001  |
| Shape Index           | 0.75 (0.70, 0.80)     | 0.76 (0.71, 0.81)                            | 0.290   |
| Eccentricity Index    | 0.75 (0.72, 0.79)     | 0.75 (0.70, 0.78)                            | 0.070   |

Supplemental Table 13. Population characteristics for the cohort of patients undergoing low-dose chest CT for attenuation correction. Groups were compared using  $\chi^2$  tests for categorical variables and Mann-Whitney U test for continuous variables. CAC – coronary artery calcification, CAD – coronary artery disease, LA – left atrium, LV – left ventricle, RA – right atrium, RV – right ventricle.

Supplemental Table 14

|                                               | Unadjusted HR<br>(95% CI) | p-value | Adjusted HR<br>(95% CI) | p-value |
|-----------------------------------------------|---------------------------|---------|-------------------------|---------|
| CAC 0                                         | Reference                 |         | Reference               |         |
| CAC 1 – 100                                   | 2.03 (1.31 – 3.16)        | 0.002   | 1.68 (1.07 - 2.63)      | 0.023   |
| CAC 101 – 400                                 | 1.91 (1.18 – 3.08)        | 0.008   | 1.44 (0.88 - 2.34)      | 0.148   |
| CAC > 400                                     | 2.40 (1.64 – 3.52)        | <0.001  | 1.56 (1.03 - 2.34)      | 0.034   |
| Left ventricular volume (per 10 mL)           | 1.07 (1.04 – 1.11)        | <0.001  | --                      |         |
| Right ventricular volume (per 10 mL)          | 1.03 (1.00 – 1.06)        | 0.062   | 0.96 (0.92 – 1.00)      | 0.041   |
| Left atrial volume (per 10 mL)                | 1.10 (1.05 – 1.15)        | <0.001  | --                      |         |
| Right atrial volume (per 10 mL)               | 1.04 (1.00 – 1.08)        | 0.076   | --                      |         |
| LV myocardial mass (per 10 g/m <sup>2</sup> ) | 1.21 (1.14 – 1.30)        | <0.001  | 1.29 (1.17 - 1.42)      | <0.001  |
| Shape index (per 0.1)                         | 1.11 (0.90 – 1.36)        | 0.328   | --                      |         |
| Eccentricity index (per 0.1)                  | 0.77 (0.69 – 1.01)        | 0.060   | --                      |         |
| Age (per 10 years)                            | 1.31 (1.15 – 1.49)        | <0.001  | 1.22 (1.06 - 1.41)      | 0.005   |
| Male                                          | 1.23 (0.91 – 1.67)        | 0.172   | --                      |         |
| Hypertension                                  | 1.04 (0.77 – 1.40)        | 0.815   | --                      |         |
| Diabetes                                      | 1.66 (1.24 – 2.23)        | 0.001   | 1.51 (1.12 - 2.03)      | 0.007   |
| Dyslipidemia                                  | 1.12 (0.83 – 1.50)        | 0.460   | --                      |         |
| Smoking                                       | 1.57 (1.10 – 2.24)        | 0.013   | 1.52 (1.06 - 2.18)      | 0.021   |
| Family history                                | 0.56 (0.31 – 1.00)        | 0.051   | --                      |         |

Supplemental Table 14: Associations with cardiovascular death or myocardial infarction in patients undergoing low-dose chest CT for attenuation correction. Given the limited number of events, a parsimonious multivariable model was developed using backward stepwise elimination, until only variables with significant associations remained. Associations evaluated using Cox proportional hazards model, to account for multiple comparisons,  $p < 0.001$  is considered statistically significant. CAC – coronary artery calcium, CI – confidence interval, HR – hazard ratio.

Supplemental Table 15

|                                             | Low<br>(<1%/year) | Intermediate<br>(1-2%/year) | High<br>(≥2%/year) |                              |       |
|---------------------------------------------|-------------------|-----------------------------|--------------------|------------------------------|-------|
| Without Events                              |                   |                             |                    |                              |       |
| Low (<1%/year)                              | 595               | 100                         | 13                 | Decreased Risk               | 0.260 |
| Intermediate (1-2%/year)                    | 515               | 832                         | 256                | Increased Risk               | 0.117 |
| High (≥2%/year)                             | 24                | 279                         | 528                | Net Reclassification         | 0.143 |
| With Events                                 |                   |                             |                    |                              |       |
| Low (<1%/year)                              | 12                | 5                           | 3                  | Decreased Risk               | 0.144 |
| Intermediate (1-2%/year)                    | 9                 | 41                          | 33                 | Increased Risk               | 0.228 |
| High (≥2%/year)                             | 0                 | 17                          | 60                 | Net Reclassification         | 0.083 |
| <b>Overall Reclassification (95% CI)</b>    |                   |                             |                    | <b>0.211 (0.120 – 0.301)</b> |       |
| <b>Continuous Reclassification (95% CI)</b> |                   |                             |                    | <b>0.334 (0.184 – 0.485)</b> |       |

Supplemental Table 15: Net-reclassification analysis for death or myocardial infarction. The predicted risk from clinical data (rows) are compared to the risk from a model combining clinical and imaging data (columns). The clinical model included age, sex, and medical history. The combined model included clinical data as well as deep learning derived imaging variables (coronary artery calcium, cardiac volumes, shape index, eccentricity index, and left ventricular mass index). Red shows patients reclassified to higher risk by one (light) or two (dark) categories, with blue showing patients recategorized to lower risk by one (light) or two (dark) categories. CI – confidence interval.

Supplemental Table 16

|                    |                 |                   |
|--------------------|-----------------|-------------------|
| LV Volume          | Normal baseline | Abnormal baseline |
| Normal follow-up   | 21997           | 59                |
| Abnormal follow-up | 52              | 78                |
| RV Volume          | Normal baseline | Abnormal baseline |
| Normal follow-up   | 21947           | 64                |
| Abnormal follow-up | 79              | 96                |
| LA Volume          | Normal baseline | Abnormal baseline |
| Normal follow-up   | 21845           | 66                |
| Abnormal follow-up | 113             | 162               |
| RA Volume          | Normal baseline | Abnormal baseline |
| Normal follow-up   | 22040           | 28                |
| Abnormal follow-up | 58              | 60                |
| LV mass index      | Normal baseline | Abnormal baseline |
| Normal follow-up   | 17792           | 599               |
| Abnormal follow-up | 1616            | 2285              |

Supplemental Table 16: Comparison of patient classification at baseline and follow-up imaging. LA – left atrium, LV – left ventricle, RA – right atrium, RV – right ventricle.
